# Supplementary material for: Up-regulation of Syndecan-4 contributes to TGF-β1-induced epithelial to mesenchymal transition in lung adenocarcinoma A549 cells
Source: PubMed Central journal article supplement — Biochem Biophys Rep. 2015 Nov 27;5:1–7. doi: 10.1016/j.bbrep.2015.11.021 (PMC5600357; doi:10.1016/j.bbrep.2015.11.021), 2015-11-27
Supplement: mmc6.pdf [file mmc6.pdf]

Table S1. DNA sequencing

| Gene       |         | promer sequences (5' to 3' ) |
|------------|---------|------------------------------|
| Syndecan-4 | Forward | GTCTGGCTCTGGAGATCTGG         |
|            | Reverse | CACCTTGTTGGACACATCCT         |
| E-cadherin | Forward | AAGGAGGCGGAGAAGAGGAC         |
|            | Reverse | CGTCGTTACGAGTCACTTCAGG       |
| Snail      | Forward | AAGGATCTCCAGGCTCGAAAG        |
|            | Reverse | GCTTCGGATGTGCATCTTGA         |
| Slug       | Forward | CTGCGGCAAGGCGTT              |
|            | Reverse | GCAGTGAGGGCAAGAAAAGG         |
| GAPDH      | Forward | GAGTCAACGGATTTGGTCGTA        |
|            | Reverse | ATGGGATTTCCATTGATGACA        |
