# Supplementary figures and images for: Up-regulation of Syndecan-4 contributes to TGF-β1-induced epithelial to mesenchymal transition in lung adenocarcinoma A549 cells
Source: PubMed Central journal article supplement — Biochem Biophys Rep. 2015 Nov 27;5:1–7. doi: 10.1016/j.bbrep.2015.11.021 (PMC5600357; doi:10.1016/j.bbrep.2015.11.021), 2015-11-27

Fig. S4

A

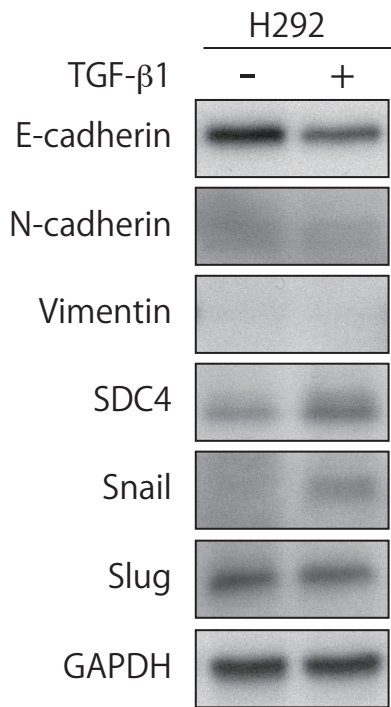

B

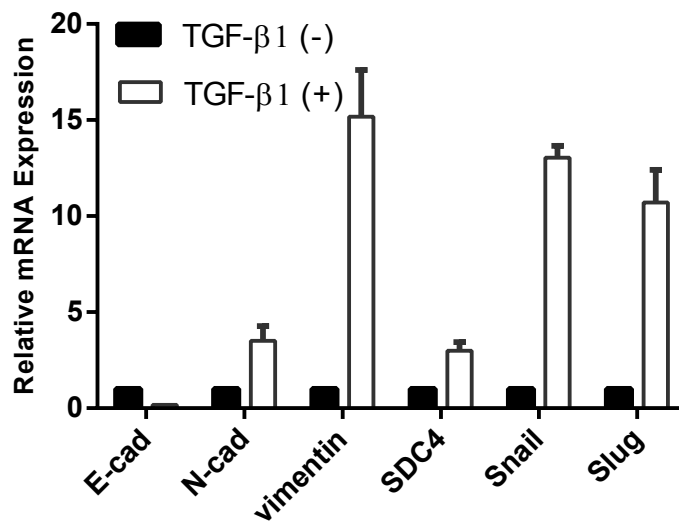

Supplement: mmc10.pdf [file mmc10.pdf]

Fig. S5

A

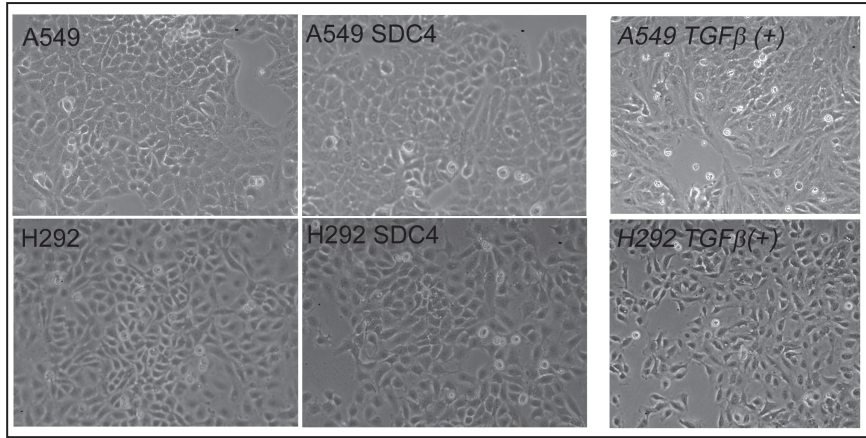

B

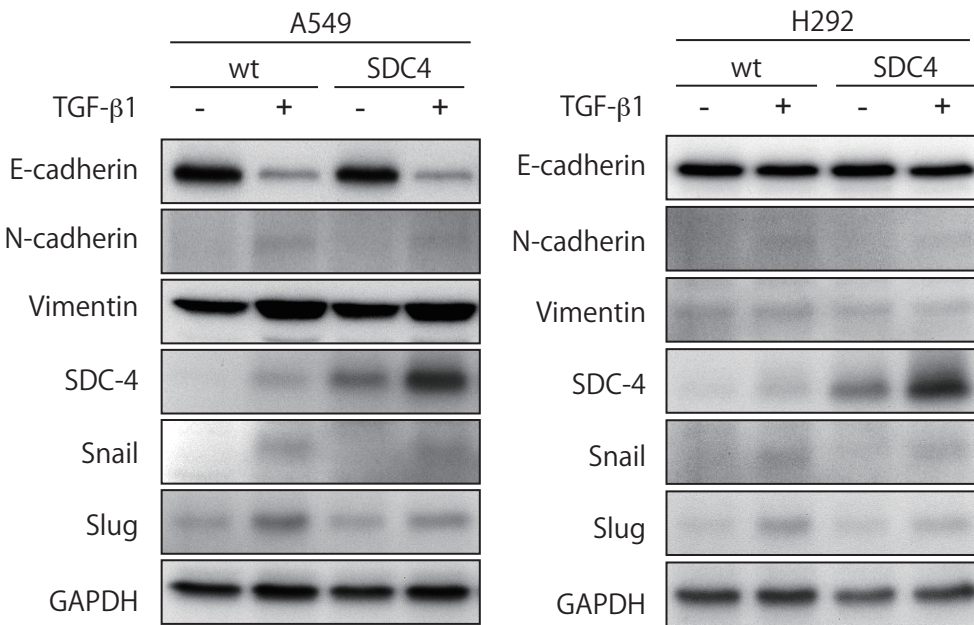

C A549 cells

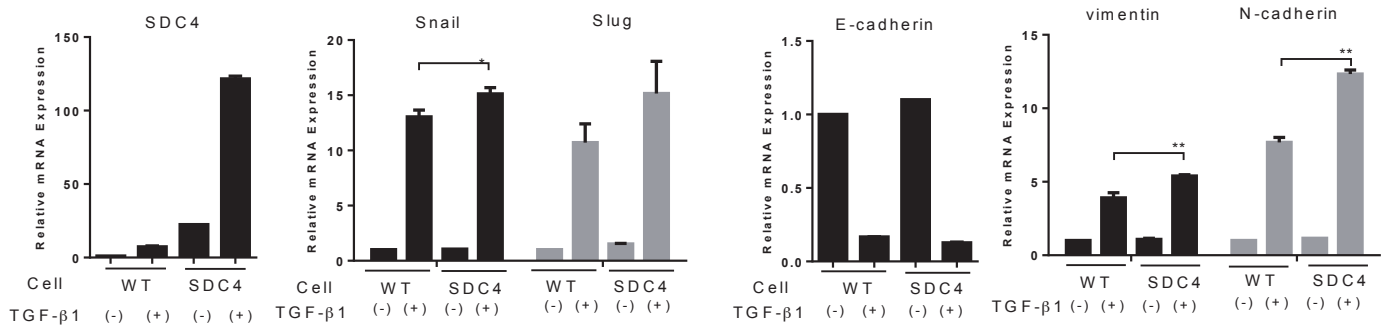

D H292 cells

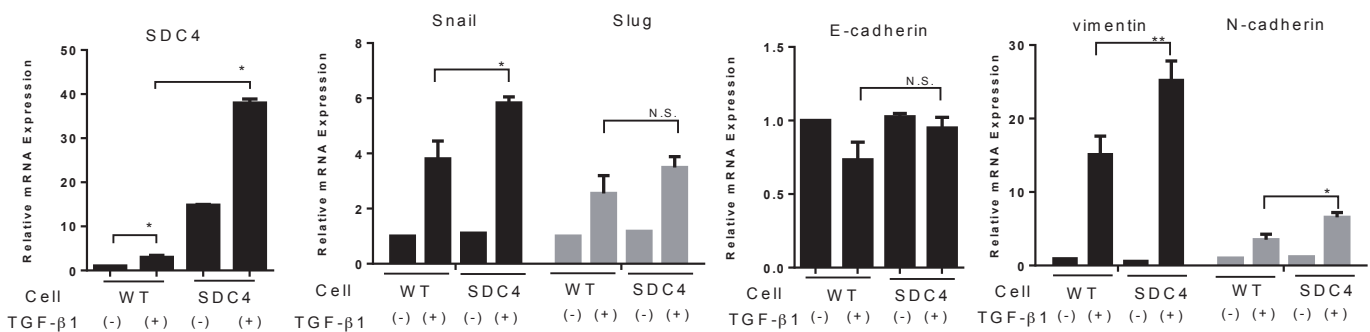

Supplement: mmc11.pdf [file mmc11.pdf]

Fig. S6 A549 cells

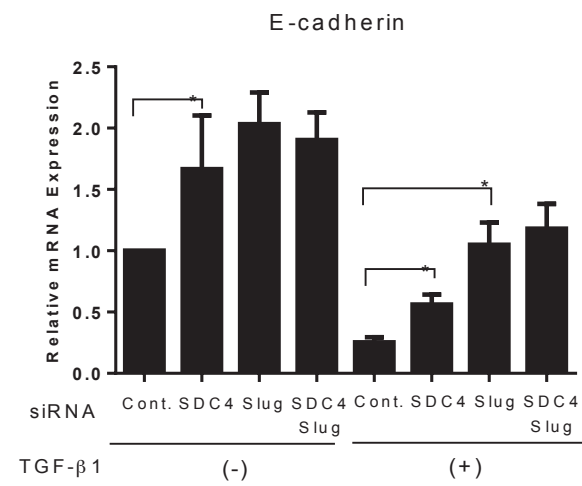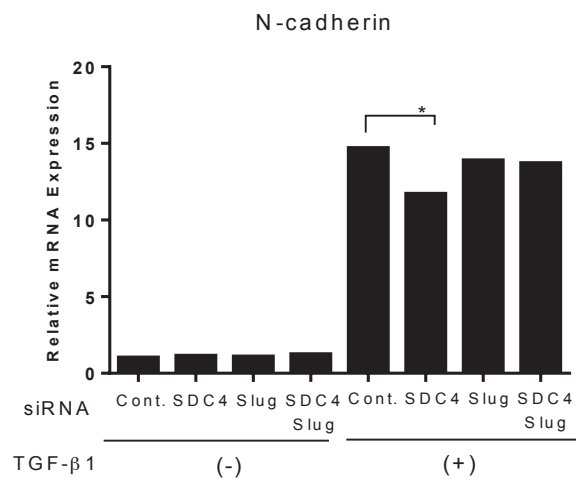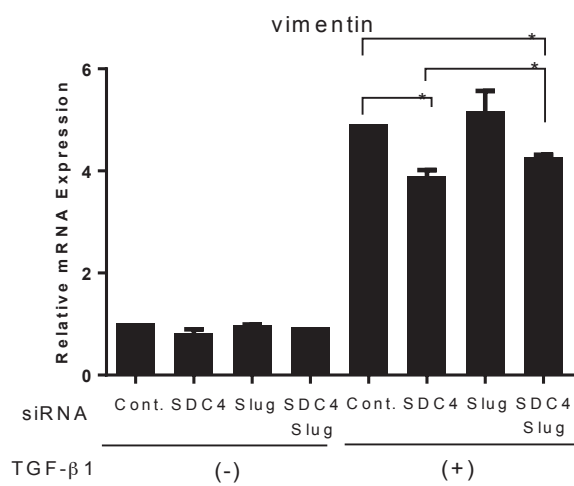

Supplement: mmc12.pdf [file mmc12.pdf]

Fig. S1

A

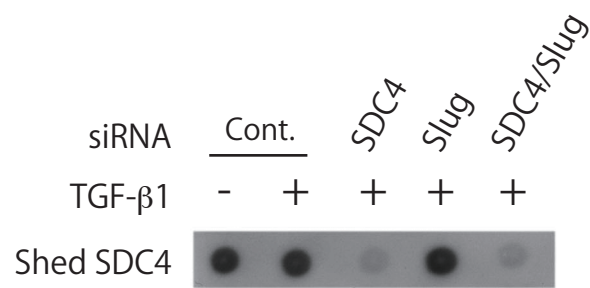

B

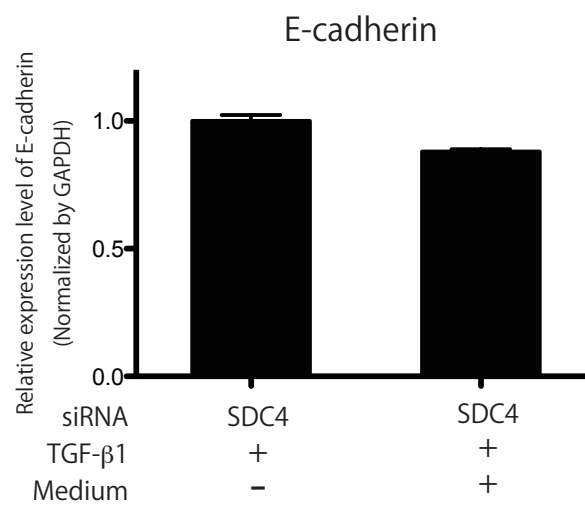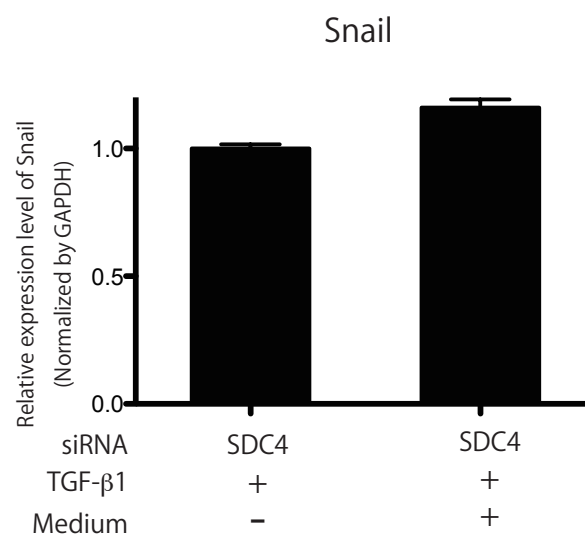

Supplement: mmc7.pdf [file mmc7.pdf]

Fig. S2

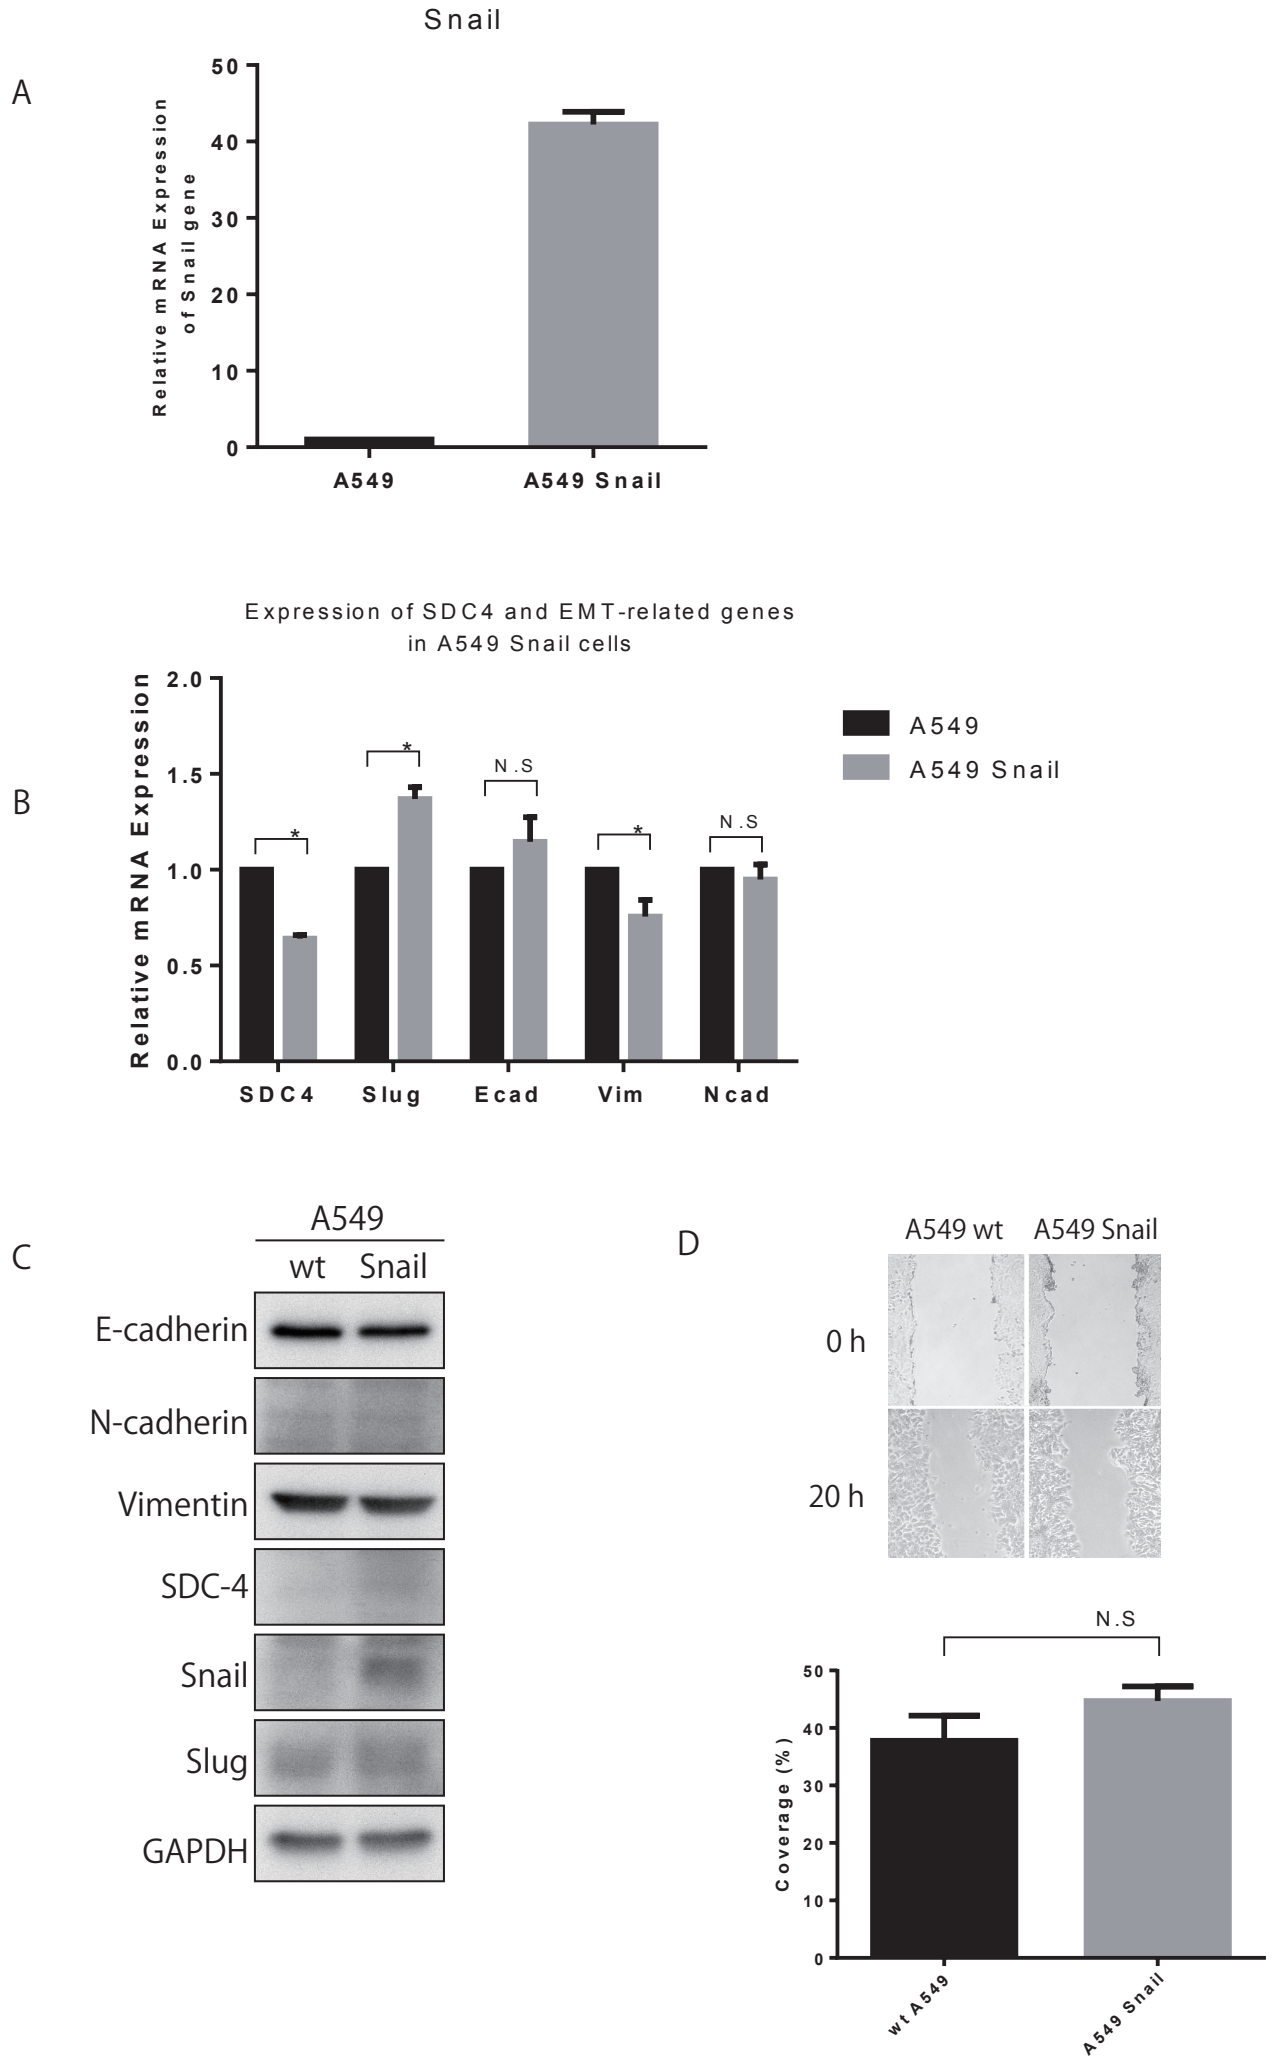

Supplement: mmc8.pdf [file mmc8.pdf]

Fig. S3

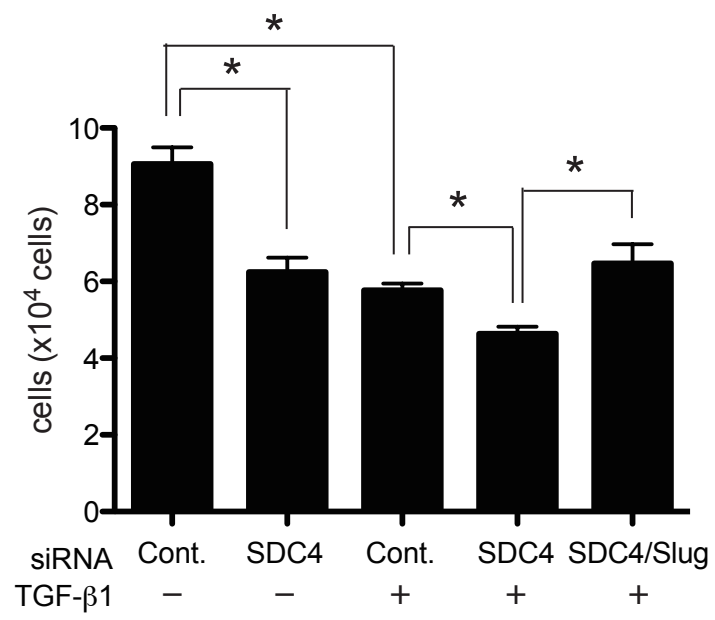

Supplement: mmc9.pdf [file mmc9.pdf]
